## Review Article

# Mesenchymal stem cells and their mitochondrial transfer: a double-edged sword

Cheng Li<sup>1,2,\*</sup>, Marco K.H. Cheung<sup>2,\*</sup>, Shuo Han<sup>1</sup>, Zhao Zhang<sup>1,2</sup>, Ling Chen<sup>3</sup>, Junhui Chen<sup>3</sup>, Hui Zeng<sup>4</sup> and  Jianxiang Qiu<sup>1</sup>

<sup>1</sup>Guangzhou Women and Children's Medical Center, Guangzhou Medical University, Guangzhou, China; <sup>2</sup>Stem Cell and Regenerative Medicine Consortium, the University of Hong Kong, Hong Kong, SAR, China; <sup>3</sup>Intervention and Cell Therapy Center, Peking University Shenzhen Hospital, Shenzhen, China; <sup>4</sup>Department of Orthopaedics, Peking University Shenzhen Hospital, Shenzhen, China

**Correspondence:** Jianxiang Qiu (qiujiangxiang2008@126.com), Hui Zeng (zenghui\_36@163.com) or Junhui Chen (chenjhpush@126.com)

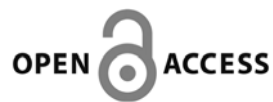

Mitochondrial dysfunction has been linked to many diseases including organ degeneration and cancer. Mesenchymal stem cells/stromal cells (MSCs) provide a valuable source for stem cell-based therapy and represent an emerging therapeutic approach for tissue regeneration. Increasing evidence suggests that MSCs can directly donate mitochondria to recover from cell injury and rescue mitochondrial damage-provoked tissue degeneration. Meanwhile, cancer cells and cancer stromal cells also cross-talk through mitochondrial exchange to regulate cancer metastasis. This review summarizes the research on MSCs and their mitochondrial transfer. It provides an overview of the biology, function, niches and signaling that play a role in tissue repair. It also highlights the pathologies of cancer growth and metastasis linked to mitochondrial exchange between cancer cells and surrounding stromal cells. It becomes evident that the function of MSC mitochondrial transfer is a double-edged sword. MSC mitochondrial transfer may be a pharmaceutical target for tissue repair and cancer therapy.

## Introduction

Mitochondria are well known as biological engines that generate energy. They decompose carbohydrates to produce adenosine triphosphate (ATP) through oxidative phosphorylation (OXPHOS), providing most of the energy needed for metabolism and movement in living organisms [1,2]. At the same time, mitochondria are also related to cellular stress responses including apoptosis and autophagy [1]. Specifically, in OXPHOS, respiratory complexes I and III generate reactive oxygen species (ROS), which modulates homeostatic signaling pathways in cellular growth and stress responses. However, ROS can also damage cell proteins, lipids and nucleic acids [1].

Mitochondrial dysfunction is one of the hallmarks of aging and is associated with a large proportion of human diseases [1,3]. ROS is one of the factors contributing to diseases associated with mitochondrial dysfunction, but its effects on cellular aging are conflicting [3,4]. One possible explanation is that ROS primarily exerts a compensatory response in adapting to stress, but when cellular damage accumulates in advanced age, excessive ROS levels alter a cell's homeostatic properties to exacerbate age-related damage. Mitochondrial dysfunction can also be attributed to ROS-independent factors, including a breach of mitochondrial integrity [3] and defective mitochondrial quality control [4]. Although mutations in mitochondrial DNA (mtDNA) or nuclear genes encoding mitochondrial proteins give rise to inherited mitochondrial diseases, mitochondrial dysfunction has also been associated with degenerative diseases such as Parkinson's disease, Alzheimer's disease and type 2 diabetes [5].

Mesenchymal stem cells/stromal cells (MSCs) are generally derived from bone marrow [6] and adipose tissue [7], or from induced pluripotent stem cells [8,9].

\* These authors contributed equally to this work.

Received: 24 December 2018  
Revised: 17 March 2019  
Accepted: 01 April 2019

Accepted Manuscript Online:  
12 April 2019  
Version of Record published:  
03 May 2019

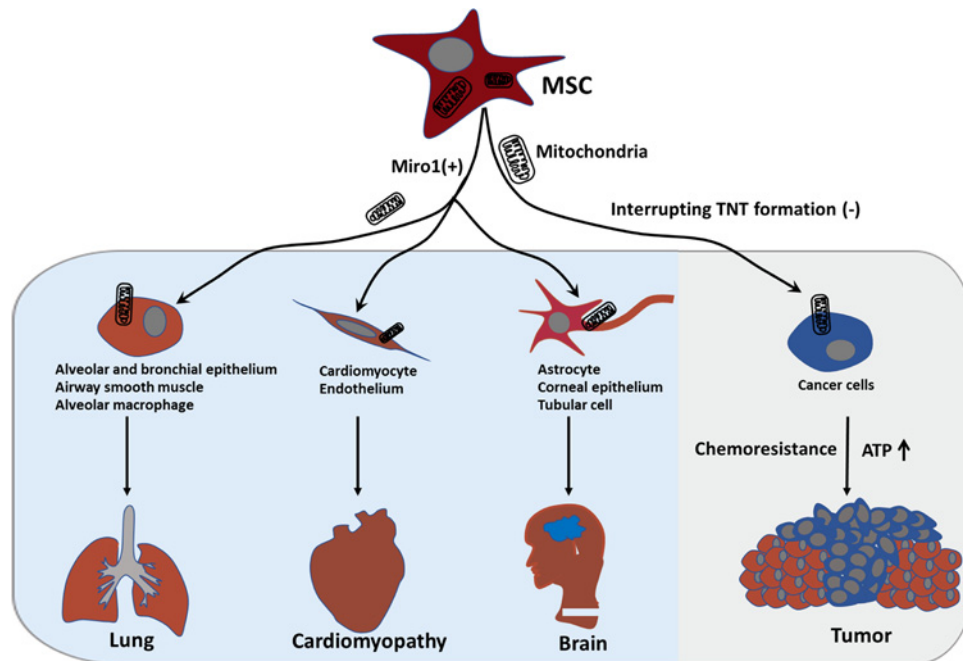

Figure 1 Schematic representation of the impact of MSC mitochondrial transfer on different systems of the body.

**Figure 1. Schematic representation of the impact of MSC mitochondrial transfer on different systems of the body**

MSC mitochondrial transfer promotes the repair of lungs in the respiratory system, alleviates the symptoms of cardiomyopathy in the circulatory system, and relieves the symptoms of neurological diseases, such as Alzheimer's disease, by increasing mitochondrial membrane potential, recovering aerobic respiration, reducing apoptosis, or ameliorating inflammation. MSC mitochondrial transfer also promotes tumor growth by enhancing OXPHOS, increasing ATP levels or resulting in greater chemoresistance. Up-regulation of Miro1 expression (Miro+) increases the efficiency of MSC mitochondrial transfer, and then promotes tissue repair. Selectively blocking of tunneling nanotube (TNT) formation can inhibit tumor growth promoted by MSC mitochondrial transfer.

The therapeutic function of MSCs is achieved mainly through paracrine, differentiation and anti-inflammatory actions [10–13]. Studies have also demonstrated that MSCs have the potential to replace the defective mitochondria or compensate for their malfunction through mitochondrial transfer between MSCs and aging cells. MSCs have become popular in cell-based therapy following their promising results in animal studies and clinical trials. Recently, Japan approved the first use of autologous adipose tissue-derived MSCs in treating Alzheimer's disease. Seemingly, the utilization of mitochondrial transfer in MSCs has a bright future in cell-based therapy.

However, mitochondrial transfer also plays a positive role in tumor growth. Transferred mitochondria produce detrimental effects to health as they sustain the growth of cancer cells by maintaining macromolecular biosynthesis and cytoplasmic pools of NAD<sup>+</sup> for high glycolytic flux [14]. Worse still, PGC-1 $\alpha$  expression in invasive cancer cells can enhance mitochondrial biogenesis and respiration, both of which are important for cell motility and metastasis [15]. Similar to normal cells, cancer cells require an optimal level of ROS to avoid excessive oxidative damage and consequent cell death [14].

In brief, mitochondrial transfer is a double-edged sword. In this mini-review, we aim to illustrate the beneficial and harmful effects of MSC mitochondrial transfer, as well as to discuss opportunities for future stem cell research.

**Mitochondrial transfer mediates tissue repair**

Numerous studies have demonstrated that transfer of mitochondria between MSCs and damaged tissue is a key mechanism for tissue repair. The first description of the transfer was the acquisition of functional mitochondria in A549  $\rho^0$  cells with mtDNA deletions or defects when they were co-cultured with human MSCs [16]. The recovery of function was demonstrated by mitochondrial activities such as increased oxygen consumption, membrane potential and intracellular ATP levels. Since the first success, MSC mitochondrial transfer has been widely studied in the cardiovascular, respiratory, neurological and renal systems (Figure 1).

### Mitochondrial transfer from MSCs to cardiovascular system

Studies have shown that it is possible to transfer human bone marrow-derived MSC (BM-MS) mitochondria to animal embryonic and adult cardiomyocytes [17–19]. Co-culture of BM-MSs and ischemic rat cardiomyocytes has been shown to increase mitochondrial membrane potential in the latter cells [17]. Furthermore, stem cell mitochondrial transfer plays a significant role in cardiomyocyte reprogramming. BM-MSs have been shown to be able to reprogram mature cardiomyocytes to progenitor-like cells with increased gene expression in early cardiac commitment through partial cell fusion [18]. In addition, BM-MSs have been studied in ischemic vascular diseases and been shown to rescue human umbilical vein endothelial cells (HUVECs) with dysfunctional mitochondria [20]. Aerobic respiration was recovered, and apoptosis of ischemic endothelial cells (ECs) was reduced following mitochondrial transfer from BM-MSs to HUVECs. Although human induced pluripotent stem cell-derived MSCs (iPSC-MSs) and BM-MSs can both deliver mitochondria to mice cardiomyocytes with doxorubicin-induced damage, iPSC-MSs have demonstrated a higher transfer efficiency than BM-MSs [21].

Intriguingly, mitochondria are not confined to a unidirectional transfer from MSCs to injured cells. In co-culture of human BM-MSs and coronary artery vascular smooth muscle cells (VSMCs), mitochondrial transfer has been demonstrated to be bidirectional with no preferential direction of movement [22]. Transfer from VSMCs to MSCs increased MSC proliferation, but not differentiation, and this effect was lost if VSMCs had dysfunctional mitochondria due to mtDNA defects. Further experiments showed that human cardiomyocytes and HUVECs challenged by hydrogen peroxide could deliver mitochondria to MSCs as a danger signal [23]. MSCs underwent autophagy of foreign mitochondria, and degraded products increased the amount of heme oxygenase-1 in the cytoplasm, which then stimulated biogenesis of MSC mitochondria. The mitochondrial transfer efficiency of MSCs increased to rescue the injured cells from apoptosis. Similar to hydrogen peroxide, MSCs were able to recover doxorubicin-damaged cells and produced ROS was involved in heme oxygenase-1 stimulation and mitochondrial biogenesis.

### Mitochondrial transfer from MSCs to respiratory system

In a study of acute lung injury induced by *Escherichia coli* lipopolysaccharide, mouse BM-MSs reduced leukocyte numbers, restored surfactant secretion and enhanced survival of mouse lungs [24]. Mitochondrial transfer from BM-MSs to alveolar epithelium was revealed by fluorescence microscopy and led to an increased alveolar ATP level. Additionally, iPSC-MSs attenuated the severity of alveolar destruction and fibrosis in rats with lung damage induced by cigarette smoke, mimicking chronic obstructive pulmonary diseases [25]. Mitochondria were shown to be delivered from iPSC-MSs to damaged bronchial epithelial cells. iPSC-MSs are also capable of delivering mitochondria to airway smooth muscle cells [26], especially in the cigarette smoke medium, to ameliorate inflammation and airway hyperresponsiveness in human lung cells and mouse lungs. Moreover, mitochondrial transfer from iPSC-MSs to ECs through tunneling nanotubes (TNTs) alleviated asthma inflammation in mice [27]. Apart from offering mitochondria to epithelial and muscle cells, MSCs have a role in the respiratory immune system. The donation of mitochondria to macrophages *in vivo* and *in vitro* has been shown to promote their phagocytic capacity and suppress pro-inflammatory cytokine secretions in an acute respiratory distress syndrome environment [28,29]. The discovery of active mitochondrial transfer for antimicrobial effects of MSCs in the acute respiratory distress syndrome animal model induced by *E. coli* pneumonia [28] may warrant further investigations in other infections.

### Mitochondrial transfer from MSCs to neurological and renal systems

Astrocytes and neuron-like pheochromocytoma cells have been shown to receive mitochondria from MSCs in co-cultivation, as revealed by fluorescence microscopy [30]. Mitochondrial transfer from MSCs to astrocytes was stimulated by oxidative stress with an increased ROS level, and the transfer to neuron-like cells recovered cellular aerobic respiration and proliferation. The stimulation of oxidative stress in transfer effectiveness has also been demonstrated in corneal epithelial cells [31]. Efficient mitochondria transfer from MSCs is essential for corneal protection and wound healing in damaged epithelial cells. Another experiment showed that MSCs could donate mitochondria to rat renal tubular cells, and rat renal tubular cells could also, to a lesser extent, transfer their mitochondria back to MSCs [32].

### Transfer of mitochondria supports tumor progression

Inflammation is an essential part of the malignant microenvironment and contributes to tumor progression [33]. In tumor-related inflammation, chemokines are key players and will attract BM-MSs to the site of inflammation [34–36]. To establish a favorable tumor microenvironment, BM-MSs may differentiate into cancer-associated fibroblasts, play an immunomodulatory function and therefore promote cancer cell growth and migration [37,38].

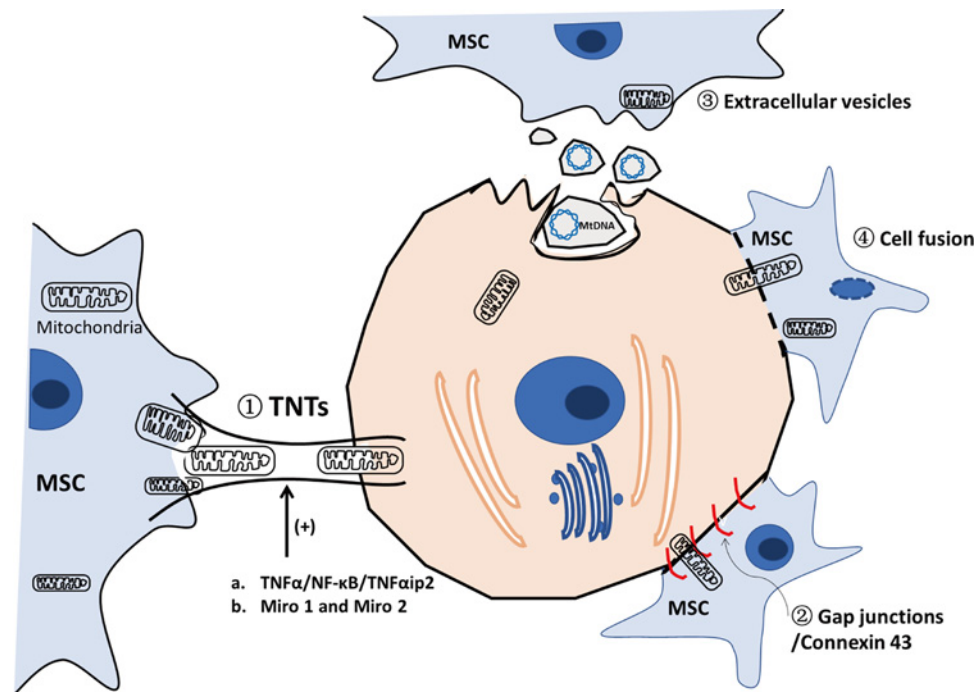

**Figure 2** Different patterns of mitochondria transfer from MSCs to somatic or tumor cells.

**Figure 2. Different patterns of mitochondria transfer from MSCs to somatic or tumor cells**

The mechanisms include transfer through intracellular TNTs, extracellular vesicles (such as exosomes), cell fusion and gap junctions. TNT formation can be regulated by  $TNF\alpha/NF-\kappa B/TNF\alpha ip2$  signaling pathway and promoted by high levels of Miro1 and Miro2.

Although mitochondrial transfer from MSCs to damaged cells has produced encouraging results in tissue repair, the effects on cancer cells are not desirable (Figure 1). Tumor growth and motility require mitochondria. MSCs can deliver mitochondria to breast cancer cells and glioblastoma stem cells [39,40]. Therefore, with the increased OXPHOS and ATP production, cell proliferation and invasion ability are enhanced after receiving MSC mitochondria [39]. In breast cancer cells, while the fusion between endogenous and exogenous mitochondria was not observed, a small amount of mtDNA from MSCs was found. The mechanisms of how transferred MSC mitochondria work, whether independently or not, remain elusive and a subject for further studies.

**Mitochondrial transfer promotes chemoresistance of breast cancer cells**

Acquisition of mitochondria also results in greater chemoresistance of breast cancer cells to doxorubicin [41]. Surprisingly, mitochondria have been found to be transferred from ECs, instead of MSCs, to cancer cells. Transfer of cytoplasmic content, but not mitochondria, has been evidenced from MSCs to cancer cells. P-glycoprotein 1 expression, which may confer multiple drug resistance in cells, has been reported absent from both cancer cells and ECs. Even in the tri-culture of cancer cells, ECs and MSCs, MSC mitochondria were not transported, while both MSCs and cancer cells received EC mitochondria. Although MSCs were capable of delivering mitochondria to damaged ECs [20,23], the complex interaction of mitochondria transfer between MSCs and multiple cell types is yet to be elucidated.

**Mitochondrial transfer promotes proliferation and chemoresistance of leukemia**

In addition to solid cancers, mitochondrial transfer may also worsen the outcome of hematological cancers. When acute myelogenous leukemia (AML) cells received mitochondria from BM-MSCs, they demonstrated increased OXPHOS and ATP production, as well as chemoresistance to cytarabine [42]. Moreover, mitochondrial transfer from MSCs and subsequent incorporation into AML cells was stimulated by treatment with cytarabine. Other chemotherapeutic drugs including etoposide and doxorubicin, but not vincristine, can also trigger incorporation of mitochondria. A remarkable finding has been that such transfer was enhanced by ROS [43], similar to the study in



doxorubicin-damaged cells [23]. ROS was revealed to be derived from NADPH oxidase-2. For T cell acute lymphoblastic leukemia (T-ALL) cells, mitochondrial transfer has been shown to be bidirectional between MSCs and T-ALL cells [44]. In contrast with AML cells, chemotherapeutic agents cytarabine and methotrexate stimulated mitochondrial transfer from T-ALL cells to MSCs, with only a few obtained from T-ALL cells. The ROS levels in T-ALL cells were hence reduced to enable their proliferation and survival. T-ALL cell chemoresistance was also enhanced. The disparity between AML and ALL cells might be explained by different adhesive properties, metabolic states, need for OXPHOS and glycolysis and hence opposite direction of mitochondrial transfer.

## Future directions in MSC mitochondrial transfer

### Elucidation of regulation of mitochondrial transfer

The main mechanisms of intercellular mitochondrial transfer adopted so far are shown in Figure 2 and expounded as follows:

- (1) At present, the theory accepted by most scholars is the formation of TNTs between the recipient cells and the donor cells with complete transfer of mitochondria achieved through active transport [21,23,25–28,31]. Several factors have been found associated with mitochondrial transfer along TNTs. Studies have shown that exercise-binding protein complexes regulate mitochondrial transport and homeostasis in TNTs. Miro 1 and Miro 2 are two Rho-GTPases linking mitochondria to kinesin and other accessory proteins, which allows mitochondria to move along the TNTs connecting two cells [45]. With higher expression of Miro 1, MSCs showed a more efficient mitochondrial transfer in cardiomyopathy [21]. Down-regulation of Miro1 expression inhibited TNTs formation and prevented the transfer of mitochondria from MSCs to ECs, demonstrating the important role of Miro1 in the transfer of mitochondria through TNTs [46]. Tumor necrosis factor  $\alpha$  (TNF $\alpha$ ) induces the formation of TNTs in cardiomyocytes and corneal epithelial cells by increasing TNF $\alpha$ IP2 expression [21,31]. NF- $\kappa$ B is a transcription factor in a conserved cascade pathway involved in diverse processes, such as cytokine expression, stress regulation, cell division and transformation by targeting on different genes [47]. Studies have shown that TNF $\alpha$  promoted the levels of NF- $\kappa$ B subunits p-I $\kappa$ B and p-P65, and TNF $\alpha$ ip2, while the NF- $\kappa$ B inhibitor SC-514 significantly attenuated the levels of p-P65 and TNF $\alpha$ ip2, and subsequently abolished the formation of TNTs [21,31]. These results suggest the regulation function of TNF $\alpha$ /NF- $\kappa$ B/TNF $\alpha$ ip2 signaling pathway in TNT formation. At the same time, TNTs may be associated with calcium signaling [48]. The physiological role of TNT-dependent electrical coupling is synchronized with cell migration activity, and calcium is the major ion that conveys this synchronizing effect to regulate proliferation, migration and differentiation in neurons [49].
- (2) Gap junctions are also shown to mediate mitochondria transfer of MSCs. Connexin 43-containing gap junction channels has been particularly well observed in a mouse model of acute lung injury *in vivo* and deliver mitochondria in microvesicles to the epithelia from bone marrow-derived stromal cells [24]. Blocking connexin-43 gap junction formation had no effect on cytoplasmic transfer, but reduced mitochondrial transfer [50].
- (3) mtDNA from MSCs is transferred via extracellular vesicles. It has been recently demonstrated that migration of mtDNA can take place via exosomes [51]. Extracellular vesicles from human MSCs have shown a therapeutic effect on severe pneumonia in mice, possibly by the transfer of mitochondria or the mRNA of key mitochondrial genes [52]. Another study indicates that MSCs could release mitochondrial particles in extracellular vesicles, which carried mtDNA and were taken up by macrophages to enhance their OXPHOS activity [53]. Through extracellular vesicles, such as exosomes, mtDNA can enter into other cells.
- (4) It has also been reported that mitochondria transfer can be achieved by selective loss of donor nuclei after complete cell fusion [54].

### Exploring mechanisms of directionality of mitochondrial transfer

Generally, mitochondrial transfer is directional, which is determined by some factors. (i) Several studies have demonstrated that directionality of mitochondrial transfer is associated with cytoskeletal microfilaments in microvesicles of connected tubular structures [24,55,56]. Plotnikov et al. [19] established that cytoplasm transfer was in a non-directional manner between cells, while mitochondrial transfer could only be from BM-MSCs to cardiomyocytes. They observed the classical submicroscopic structure and cytoskeletal structure of mitochondria in the microbubbles connected to the pipeline structure, suggesting that the cytoskeletal microfilament may be an important element guiding the one-way transport of microbubbles. (ii) Another study suggested that receptor cell damage may promote unidirectional transfer of mitochondria from MSCs to damaged cells [23]. (iii) Recent studies have shown that some of the damage or apoptotic factors (such as phosphatidylserine) expressed on the surface of damaged cells

can selectively aggregate and guide the formation of connecting ducts [57]. As bidirectional mitochondrial transfer has occasionally been observed [22,23,44], the mechanism about the directionality of mitochondrial transfer remains to be further elucidated.

### Potential targeted therapy against mitochondrial transfer in cancer

Mitochondrial biogenesis and respiration are critical for tumor cell growth, survival and metastasis [15]. Dong et al. [58] have shown that mtDNA is critical for the production of tumors in mice. In the absence of mtDNA, metastatic melanoma cells with defective respiratory function could not form tumors. After obtaining complete mitochondria and mtDNA by mitochondrial transfer, the respiratory function of the cells could be restored [58]. It is demonstrated that selectively blocking TNT formation prevents mitochondrial metastasis, and thereby inhibits tumor growth [59]. Studies in hormonal therapy-resistant metastatic breast cancer have also shown that horizontal transfer of mtDNA via extracellular vesicles plays a role in an exit from dormancy of cancer stem-like cells and leads to endocrine therapy resistance [60]. Inhibition mitochondrial function in epithelial cancer cells could overcome the anti-estrogen resistance in breast cancer [61]. Many drugs target and alter mitochondrial function during cancer treatment [62]. Some studies have shown that mitochondria can be used to transport some pro-oxidant anticancer compounds, such as vitamin E analogs and phenylethyl isothiocyanate, which can induce apoptosis in cancer cells by producing ROS [63]. Mitochondria-targeted vitamin E succinate has been reported to effectively induce apoptosis in human breast cancer cell line MCF-7 [63]. In view of the multiple metabolic pathways of cancer cells, mitochondrial targeting to treat cancer remains to be further studied.

### Potential therapeutic use of mitochondrial transfer in mitochondria-related diseases

Myocardial ischemia and reperfusion results in severe mitochondrial loss that can lead to ischemic necrosis of cardiomyocytes [64]. Clinical trials have demonstrated that autologous mitochondria can be extracted from the patient's muscle for autologous treatment [65,66]. Intravenous mitochondria treatment of mitochondrial diseases has been tried in multiple organs. When exogenous mitochondria are administered intravenously to mice, they can be rapidly distributed to multiple tissues and organs. Therefore, mitochondrial transfer can be used to treat mitochondria-related diseases involving multi-tissue lesions. Intravenous injection of exogenous mitochondria into a mouse model of Parkinson's disease has been shown to significantly improve the symptoms of Parkinson's disease. The mechanism is related to increased electron transport chain activity, reduced the level of reactive oxygen free radicals and prevention of apoptosis and necrosis [67].

## Conclusions

Mitochondrial transfer is a ubiquitous phenomenon that is associated with various physiological and pathological activities of the body. Therefore, mitochondrial treatment through mitochondrial transfer has potentially broad applications. We can effectively treat with MSCs by mitochondrial transfer to restore normal physiological functions of cells and recover patients from diseased condition. Meanwhile, inhibition of mitochondrial transfer from stromal cells to cancer cells may serve a potential therapeutic target.

### Acknowledgments

We thank Dr Qizhou Lian's (University of Hong Kong) comments on the conceptualization and organization of this manuscript.

### Competing Interests

The authors declare that there are no competing interests associated with the manuscript.

### Funding

This research was supported in part by the Start-up Funding by Guangzhou Women and Children's Medical Center [grant numbers 4001010 (to J.Q. and Z.Z.)], and by the grant from Sanming Projects of Medicine in Shenzhen [grant numbers SZSM201612071 (to C.L. and J.H.)].

### Abbreviations

AML, acute myelogenous leukemia; ATP, adenosine triphosphate; BM-MSC, bone marrow-derived MSC; EC, endothelial cell; HUVEC, human umbilical vein endothelial cell; iPSC-MSC, induced pluripotent stem cell-derived MSC; mtDNA, mitochondrial DNA; MSC, mesenchymal stem cell/stromal cell; OXPHOS, oxidative phosphorylation; ROS, reactive oxygen species; TNF $\alpha$ ,

tumor necrosis factor  $\alpha$ ; TNT, tunneling nanotube; T-ALL, T cell acute lymphoblastic leukemia; VSMC, vascular smooth muscle cell.

## References

- 1 Nunnari, J. and Suomalainen, A. (2012) Mitochondria: in sickness and in health. *Cell* **148**, 1145–1159, <https://doi.org/10.1016/j.cell.2012.02.035>
- 2 Newmeyer, D.D. and Ferguson-Miller, S. (2003) Mitochondria: releasing power for life and unleashing the machineries of death. *Cell* **112**, 481–490, [https://doi.org/10.1016/S0092-8674\(03\)00116-8](https://doi.org/10.1016/S0092-8674(03)00116-8)
- 3 Carlos, L.-O., Blasco, M.A., Partridge, L., Serrano, M. and Kroemer, G. (2013) The hallmarks of aging. *Cell* **153**, 1194–1217, <https://doi.org/10.1016/j.cell.2013.05.039>
- 4 Picca, A., Mankowski, R.T., Burman, J.L., Donisi, L., Kim, J.S., Marzetti, E. et al. (2018) Mitochondrial quality control mechanisms as molecular targets in cardiac ageing. *Nat. Rev. Cardiol.* **15**, 1, <https://doi.org/10.1038/s41569-018-0059-z>
- 5 Schapira, A.H. (2012) Mitochondrial diseases. *Lancet North Am. Ed.* **379**, 1825–1834, [https://doi.org/10.1016/S0140-6736\(11\)61305-6](https://doi.org/10.1016/S0140-6736(11)61305-6)
- 6 Gardner, O.F., Alini, M. and Stoddart, M.J. (2015) Mesenchymal stem cells derived from human bone marrow. *Methods Mol. Biol.* **1340**, 41–52, [https://doi.org/10.1007/978-1-4939-2938-2\\_3](https://doi.org/10.1007/978-1-4939-2938-2_3)
- 7 Mahmoudifar, N. and Doran, P.M. (2015) Mesenchymal stem cells derived from human adipose tissue. *Methods Mol. Biol.* **1340**, 53–64, [https://doi.org/10.1007/978-1-4939-2938-2\\_4](https://doi.org/10.1007/978-1-4939-2938-2_4)
- 8 Luzzani, C.D. and Miriuka, S.G. (2017) Pluripotent stem cells as a robust source of mesenchymal stem cells. *Stem Cell Rev.* **13**, 68–78, <https://doi.org/10.1007/s12015-016-9695-z>
- 9 Lian, Q., Zhang, Y., Liang, X., Gao, F. and Tse, H.F. (2016) Directed differentiation of human-induced pluripotent stem cells to mesenchymal stem cells. *Methods Mol. Biol.* **1416**, 289–298, [https://doi.org/10.1007/978-1-4939-3584-0\\_17](https://doi.org/10.1007/978-1-4939-3584-0_17)
- 10 Gneccchi, M., Danielli, P., Malpasso, G. and Ciuffreda, M.C. (2016) Paracrine mechanisms of mesenchymal stem cells in tissue repair. *Methods Mol. Biol.* **1416**, 123–146, [https://doi.org/10.1007/978-1-4939-3584-0\\_7](https://doi.org/10.1007/978-1-4939-3584-0_7)
- 11 Wong, S.P., Rowley, J.E., Redpath, A.N., Tilman, J.D., Fellous, T.G. and Johnson, J.R. (2015) Pericytes, mesenchymal stem cells and their contributions to tissue repair. *Pharmacol. Ther.* **151**, 107–120, <https://doi.org/10.1016/j.pharmthera.2015.03.006>
- 12 Ding, Y., Liang, X., Zhang, Y., Yi, L., Shum, H.C., Chen, Q. et al. (2018) Rap1 deficiency-provoked paracrine dysfunction impairs immunosuppressive potency of mesenchymal stem cells in allograft rejection of heart transplantation. *Cell Death Dis.* **9**, 386, <https://doi.org/10.1038/s41419-018-0414-3>
- 13 Zhang, Y., Chiu, S., Liang, X., Gao, F., Zhang, Z., Liao, S. et al. (2015) Rap1-mediated nuclear factor-kappaB (NF-kappaB) activity regulates the paracrine capacity of mesenchymal stem cells in heart repair following infarction. *Cell Death Discov.* **1**, 15007, <https://doi.org/10.1038/cddiscovery.2015.7>
- 14 Schulze, A. and Harris, A.L. (2013) How cancer metabolism is tuned for proliferation and vulnerable to disruption. *Nature* **491**, 364–373, <https://doi.org/10.1038/nature11706>
- 15 Lebleu, V.S., O'Connell, J.T., Gonzalez Herrera, K.N., Wikman, H., Pantel, K., Haigis, M.C. et al. (2014) PGC-1 $\alpha$  mediates mitochondrial biogenesis and oxidative phosphorylation in cancer cells to promote metastasis. *Nat. Cell Biol.* **16**, 992–1003, <https://doi.org/10.1038/ncb3039>
- 16 Spees, J.L., Olson, S.D., Whitney, M.J. and Prockop, D.J. (2006) Mitochondrial transfer between cells can rescue aerobic respiration. *Proc. Natl. Acad. Sci. U.S.A.* **103**, 1283–1288, <https://doi.org/10.1073/pnas.0510511103>
- 17 Han, H., Hu, J., Yan, Q., Zhu, J., Zhu, Z., Chen, Y. et al. (2016) Bone marrow-derived mesenchymal stem cells rescue injured H9c2 cells via transferring intact mitochondria through tunneling nanotubes in an in vitro simulated ischemia/reperfusion model. *Mol. Med. Rep.* **13**, 1517–1524, <https://doi.org/10.3892/mmr.2015.4726>
- 18 Acquistapace, A., Bru, T., Lesault, P.F., Figeac, F., Coudert, A.E., OI, Coz et al. (2011) Human mesenchymal stem cells reprogram adult cardiomyocytes toward a progenitor-like state through partial cell fusion and mitochondria transfer. *Stem Cells* **29**, 812–824, <https://doi.org/10.1002/stem.632>
- 19 Plotnikov, E.Y., Khryapenkova, T.G., Vasileva, A.K., Marey, M.V., Galkina, S.I., Isaev, N.K. et al. (2010) Cell-to-cell cross-talk between mesenchymal stem cells and cardiomyocytes in co-culture. *J. Cell. Mol. Med.* **12**, 1622–1631, <https://doi.org/10.1111/j.1582-4934.2007.00205.x>
- 20 Liu, K., Ji, K., Guo, L., Wu, W., Lu, H., Shan, P. et al. (2014) Mesenchymal stem cells rescue injured endothelial cells in an in vitro ischemia-reperfusion model via tunneling nanotube like structure-mediated mitochondrial transfer. *Microvasc. Res.* **92**, 10–18, <https://doi.org/10.1016/j.mvr.2014.01.008>
- 21 Zhang, Y., Yu, Z., Jiang, D., Liang, X., Liao, S., Zhang, Z. et al. (2016) iPSC-MSCs with high intrinsic Miro1 and sensitivity to TNF- $\alpha$  yield efficacious mitochondrial transfer to rescue anthracycline-induced cardiomyopathy. *Stem Cell Rep.* **7**, 749–763, <https://doi.org/10.1016/j.stemcr.2016.08.009>
- 22 Vallabhaneni, K.C., Haller, H. and Dumler, I. (2012) Vascular smooth muscle cells initiate proliferation of mesenchymal stem cells by mitochondrial transfer via tunneling nanotubes. *Stem Cells Dev.* **21**, 3104–3113, <https://doi.org/10.1089/scd.2011.0691>
- 23 Mahroufyorgov, M., Augeul, L., Da, S.C., Jourdan, M., Rigolet, M., Manin, S. et al. (2017) Mesenchymal stem cells sense mitochondria released from damaged cells as danger signals to activate their rescue properties. *Cell Death Differ.* **24**, 1224–1238, <https://doi.org/10.1038/cdd.2017.51>
- 24 Islam, M.N., Das, S.R., Emin, M.T., Wei, M., Sun, L., Westphalen, K. et al. (2012) Mitochondrial transfer from bone-marrow-derived stromal cells to pulmonary alveoli protects against acute lung injury. *Nat. Med.* **18**, 759–765, <https://doi.org/10.1038/nm.2736>
- 25 Li, X., Zhang, Y., Yeung, S.C., Liang, Y., Liang, X., Ding, Y. et al. (2014) Mitochondrial transfer of induced pluripotent stem cell-derived mesenchymal stem cells to airway epithelial cells attenuates cigarette smoke-induced damage. *Am. J. Respir. Cell Mol. Biol.* **51**, 455–465, <https://doi.org/10.1165/rcmb.2013-0529OC>
- 26 Li, X., Michaeloudes, C., Zhang, Y., Wiegman, C.H., Adcock, I.M., Lian, Q. et al. (2017) Mesenchymal stem cells alleviate oxidative stress-induced mitochondrial dysfunction in the airways. *J. Allergy Clin. Immunol.* **141**, 1634–1645, <https://doi.org/10.1016/j.jaci.2017.08.017>
- 27 Yao, Y., Fan, X.L., Jiang, D., Zhang, Y., Li, X., Xu, Z.B. et al. (2018) Connexin 43-mediated mitochondrial transfer of iPSC-MSCs alleviates asthma inflammation. *Stem Cell Rep.* **11**, 1120–1135, <https://doi.org/10.1016/j.stemcr.2018.09.012>

- 28 Jackson, M.V., Morrison, T.J., Doherty, D.F., Mcauley, D.F., Matthay, M.A., Kissenpfennig, A. et al. (2016) Mitochondrial transfer via tunneling nanotubes is an important mechanism by which mesenchymal stem cells enhance macrophage phagocytosis in the *in vitro* and *in vivo* models of ARDS. *Stem Cells* **34**, 2210–2223, <https://doi.org/10.1002/stem.2372>
- 29 Morrison, T.J., Jackson, M.V., Cunningham, E.K., Kissenpfennig, A., Mcauley, D.F., O’Kane, C.M. et al. (2017) Mesenchymal stromal cells modulate macrophages in clinically relevant lung injury models by extracellular vesicle mitochondrial transfer. *Am. J. Respir. Crit. Care Med.* **196**, 1275–1286, <https://doi.org/10.1164/rccm.201701-01700C>
- 30 Babenko, V.A., Silachev, D.N., Popkov, V.A., Zorova, L.D., Pevzner, I.B., Plotnikov, E.Y. et al. (2018) Miro1 enhances mitochondria transfer from multipotent mesenchymal stem cells (MMSC) to neural cells and improves the efficacy of cell recovery. *Molecules* **23**, E687, <https://doi.org/10.3390/molecules23030687>
- 31 Jiang, D., Gao, F., Zhang, Y., Wong, D.S., Li, Q., Tse, H.F. et al. (2016) Mitochondrial transfer of mesenchymal stem cells effectively protects corneal epithelial cells from mitochondrial damage. *Cell Death Dis.* **7**, e2467, <https://doi.org/10.1038/cddis.2016.358>
- 32 Plotnikov, E.Y., Khryapenkova, T.G., Galkina, S.I., Sukhikh, G.T. and Zorov, D.B. (2010) Cytoplasm and organelle transfer between mesenchymal multipotent stromal cells and renal tubular cells in co-culture. *Expl. Cell Res.* **316**, 2447–2455, <https://doi.org/10.1016/j.yexcr.2010.06.009>
- 33 Mantovani, A., Allavena, P., Sica, A. and Balkwill, F. (2008) Cancer-related inflammation. *Nature* **454**, 436–444, <https://doi.org/10.1038/nature07205>
- 34 Allavena, P., Germano, G., Marchesi, F. and Mantovani, A. (2011) Chemokines in cancer related inflammation. *Exp. Cell Res.* **317**, 664–673, <https://doi.org/10.1016/j.yexcr.2010.11.013>
- 35 Jung, Y., Kim, J.K., Shiozawa, Y., Wang, J., Mishra, A., Joseph, J. et al. (2013) Recruitment of mesenchymal stem cells into prostate tumours promotes metastasis. *Nat. Commun.* **4**, 1795, <https://doi.org/10.1038/ncomms2766>
- 36 Guan, X.-y., Jing, Y., Han, Z., Liu, Y., Sun, K., Zhang, S. et al. (2012) Mesenchymal stem cells in inflammation microenvironment accelerates hepatocellular carcinoma metastasis by inducing epithelial-mesenchymal transition. *PLoS ONE* **7**, e43272, <https://doi.org/10.1371/journal.pone.0043272>
- 37 Bergfeld, S.A. and DeClerck, Y.A. (2010) Bone marrow-derived mesenchymal stem cells and the tumor microenvironment. *Cancer Metastasis Rev.* **29**, 249–261, <https://doi.org/10.1007/s10555-010-9222-7>
- 38 Whiteside, T.L. (2008) The tumor microenvironment and its role in promoting tumor growth. *Oncogene* **27**, 5904–5912, <https://doi.org/10.1038/onc.2008.271>
- 39 Caicedo, A., Fritz, V., Brondello, J.M., Ayala, M., Dennemont, I., Abdellaoui, N. et al. (2015) MitoCeption as a new tool to assess the effects of mesenchymal stem/stromal cell mitochondria on cancer cell metabolism and function. *Sci. Rep.* **5**, 9073, <https://doi.org/10.1038/srep09073>
- 40 Nzigou, M.B., Gerbal-Chaloin, S., Bokus, A., Daujat-Chavanieu, M., Jorgensen, C., Hugnot, J.P. et al. MitoCeption: transferring isolated human MSC mitochondria to glioblastoma stem cells. *J. Vis. Exp.* **2017**, e55245
- 41 Pasquier, J. (2013) Preferential transfer of mitochondria from endothelial to cancer cells through tunneling nanotubes modulates chemoresistance. *J. Transl. Med.* **11**, 94, <https://doi.org/10.1186/1479-5876-11-94>
- 42 Moschoi, R., Imbert, V., Nebout, M., Chiche, J., Mary, D., Prebet, T. et al. (2016) Protective mitochondrial transfer from bone marrow stromal cells to acute myeloid leukemic cells during chemotherapy. *Blood* **128**, 253, <https://doi.org/10.1182/blood-2015-07-655860>
- 43 Marlein, C.R., Zaitseva, L., Piddock, R.E., Robinson, S., Edwards, D., Shafat, M.S. et al. (2017) NADPH oxidase-2 derived superoxide drives mitochondrial transfer from bone marrow stromal cells to leukemic blasts. *Blood* **130**, 1649–1660
- 44 Wang, J., Liu, X., Yuan, Q., Shi, Y., Cai, J., Wang, B. et al. (2018) Cell adhesion-mediated mitochondria transfer contributes to mesenchymal stem cell-induced chemoresistance on T cell acute lymphoblastic leukemia cells. *J. Hematol. Oncol.* **11**, 11
- 45 Paliwal, S., Chaudhuri, R., Agrawal, A. and Mohanty, S. (2018) Regenerative abilities of mesenchymal stem cells through mitochondrial transfer. *J. Biomed. Sci.* **25**, 31, <https://doi.org/10.1186/s12929-018-0429-1>
- 46 Ahmad, T., Mukherjee, S., Pattnaik, B.R., Kumar, M., Singh, S., Rehman, R. et al. (2013) Miro 1 knockdown in stem cells inhibits mitochondrial donation mediated rescue of bronchial epithelial injury. *Biophys. J.* **104**, 659a, <https://doi.org/10.1016/j.bpj.2012.11.3638>
- 47 Tong, L. and Tergaonkar, V. (2014) Rho protein GTPases and their interactions with NFKappaB: crossroads of inflammation and matrix biology. *Biosci. Rep.* **34**, e00115, <https://doi.org/10.1042/BSR20140021>
- 48 Gerdes, H.H., Rustom, A. and Wang, X. (2013) Tunneling nanotubes, an emerging intercellular communication route in development. *Mech. Dev.* **130**, 381–387, <https://doi.org/10.1016/j.mod.2012.11.006>
- 49 Spitzer, N.C. (2006) Electrical activity in early neuronal development. *Nature* **444**, 707–712, <https://doi.org/10.1038/nature05300>
- 50 Sinclair, K.A., Yerkovich, S.T., Hopkins, P.M. and Chambers, D.C. (2016) Characterization of intercellular communication and mitochondrial donation by mesenchymal stromal cells derived from the human lung. *Stem. Cell Res. Ther.* **7**, 91, <https://doi.org/10.1186/s13287-016-0354-8>
- 51 Guescini, M., Genedani, S., Stocchi, V. and Agnati, L.F. (2010) Astrocytes and Glioblastoma cells release exosomes carrying mtDNA. *J. Neural Transm.* **117**, 1–4, <https://doi.org/10.1007/s00702-009-0288-8>
- 52 Monsel, A., Zhu, Y.G., Gennai, S., Hao, Q., Hu, S., Rouby, J.J. et al. (2015) Therapeutic effects of human mesenchymal stem cell-derived microvesicles in severe pneumonia in mice. *Am. J. Respir. Crit. Care Med.* **192**, 324–336, <https://doi.org/10.1164/rccm.201410-17650C>
- 53 Phinney, D.G., Di Giuseppe, M., Njah, J., Sala, E., Shiva, S., St Croix, C.M. et al. (2015) Mesenchymal stem cells use extracellular vesicles to outsource mitophagy and shuttle microRNAs. *Nat. Commun.* **6**, 8472, <https://doi.org/10.1038/ncomms9472>
- 54 AlvarezDolado, M., Pardo, R., Garcia Verdugo, J.M., Fike, J.R., Lee, H.O., Pfeffer, K. et al. (2003) Fusion of bone-marrow-derived cells with Purkinje neurons, cardiomyocytes and hepatocytes. *Nature* **425**, 968–973, <https://doi.org/10.1038/nature02069>
- 55 Ahmad, T., Mukherjee, S., Pattnaik, B., Kumar, M., Singh, S., Kumar, M. et al. (2014) Miro1 regulates intercellular mitochondrial transport and enhances mesenchymal stem cell rescue efficacy. *EMBO J.* **33**, 994–1010
- 56 Kaoru, Y., Anupama, K., Leonid, B., Shoichi, M., Zhang, F., Alberto, N. et al. (2011) Tunneling nanotubes mediate rescue of prematurely senescent endothelial cells by endothelial progenitors: exchange of lysosomal pool. *Aging* **3**, 597–608, <https://doi.org/10.18632/aging.100341>



- 57 Zhang, Q., Raof, M., Chen, Y., Sumi, Y., Sursal, T., Junger, W. et al. (2010) Circulating mitochondrial DAMPs cause inflammatory responses to injury. *Nature* **464**, 104–107, <https://doi.org/10.1038/nature08780>
- 58 Dong, L.F., Kovarova, J., Bajzikova, M., Bezawork-Geleta, A., Svec, D., Endaya, B. et al. (2017) Horizontal transfer of whole mitochondria restores tumorigenic potential in mitochondrial DNA-deficient cancer cells. *Elife* **6**, e22187, <https://doi.org/10.7554/eLife.22187>
- 59 Bukoreshtliev, N.V., Wang, X., Hodneland, E., Gurke, S., Barroso, J.F. and Gerdes, H.H. (2009) Selective block of tunneling nanotube (TNT) formation inhibits intercellular organelle transfer between PC12 cells. *FEBS Lett.* **583**, 1481–1488, <https://doi.org/10.1016/j.febslet.2009.03.065>
- 60 Sansone, P., Savini, C., Kurelac, I., Chang, Q., Amato, L.B., Strillacci, A. et al. (2017) Packaging and transfer of mitochondrial DNA via exosomes regulate escape from dormancy in hormonal therapy-resistant breast cancer. *Proc. Natl. Acad. Sci. U.S.A.* **114**, E9066–E9075, <https://doi.org/10.1073/pnas.1704862114>
- 61 Martinez-Outschoorn, U.E., Goldberg, A., Lin, Z., Ko, Y.H., Flomenberg, N., Wang, C. et al. (2011) Anti-estrogen resistance in breast cancer is induced by the tumor microenvironment and can be overcome by inhibiting mitochondrial function in epithelial cancer cells. *Cancer Biol. Ther.* **12**, 924–938, <https://doi.org/10.4161/cbt.12.10.17780>
- 62 Barbosa, I.A., Machado, N.G., Skildum, A.J., Scott, P.M. and Oliveira, P.J. (2012) Mitochondrial remodeling in cancer metabolism and survival: potential for new therapies. *Biochim. Biophys. Acta* **1826**, 238–254
- 63 Ralph, S.J. and Neuzil, J. (2009) Mitochondrially delivered anti-cancer compounds. *Patent*, United States, US RE47300 E
- 64 Honda, H.M., Korge, P. and Weiss, J.N. (2010) Mitochondria and ischemia/reperfusion injury. *Ann. N.Y. Acad. Sci.* **1047**, 248–258, <https://doi.org/10.1196/annals.1341.022>
- 65 Cowan, D.B., Yao, R., Akurathi, V., Snay, E.R., Thedsanamoorthy, J.K., Zurakowski, D. et al. (2016) Intracoronary delivery of mitochondria to the ischemic heart for cardioprotection. *PLoS ONE* **11**, e0160889, <https://doi.org/10.1371/journal.pone.0160889>
- 66 Mccully, J.D., Sidney, L., Del, N.P.J. and Cowan, D.B. (2016) Mitochondrial transplantation for therapeutic use. *Clin. Transl. Med.* **5**, 16, <https://doi.org/10.1186/s40169-016-0095-4>
- 67 Kitani, T., Kami, D., Kawasaki, T., Nakata, M., Matoba, S. and Gojo, S. (2014) Direct human mitochondrial transfer: a novel concept based on the endosymbiotic theory. *Transplant Proc.* **46**, 1233–1236, <https://doi.org/10.1016/j.transproceed.2013.11.133>
